# Supplementary material for: Synthesis of a metal-free coordinating ring via formation of a cleavable [2]catenane
Source: Royal Society of Chemistry journal article supplement (doi:10.1039/c3cc46452k), 2013-01-01
Supplement: c3cc46452k.pdf [file c3cc46452k.pdf]

# Synthesis of a metal-free coordinating ring *via* formation of a cleavable [2]catenane

Frédéric Niess , Jean-Pierre Sauvage\*

Institut de Science et d'Ingénierie Supramoléculaires (ISIS), Université de Strasbourg et CNRS, 8 allée Gaspard Monge, 67000 Strasbourg, France. E-mail: jpsauvage@unistra.fr

## Synthetic procedures and products characterizations

### General methods:

All reagents and solvents were purchased at the highest commercial quality from chemical suppliers (Sigma-Aldrich, Merck, Fluka) and used without further purification unless otherwise noted. All reactions were carried out under nitrogen atmosphere with dry solvents under anhydrous conditions. Dry solvents were obtained using a double column SolvTech purification system. Water was deionized using a Millipore Elix 10 filtration system (Millipore, Molsheim, France). Yields refer to spectroscopically purified (<sup>1</sup>H NMR) homogeneous materials.

*Thin Layer Chromatographies* were performed using TLC silica plastic sheets (Polygram SIL G/UV254, Macherey-Nagel) or TLC alox plastic sheets (Polygram Alox N/UV254, Macherey-Nagel). In most cases, irradiation using a *Bioblock VL-4C* UV-Lamp (6 W, 254 nm and/or 365 nm). *Preparative Adsorption Flash Column Chromatographies* were performed using silica gel (Geduran, silica gel 60 (230 – 400 mesh, 40 – 63 μm, Merck)) or aluminium oxide 90 (standardized activity II, 70 – 230 mesh, Merck).

<sup>1</sup>H NMR spectra were recorded on a *Bruker Avance 400* spectrometer at 400 MHz and <sup>13</sup>C spectra at 100 MHz. The spectra were internally referenced to the residual proton solvent signal. Residual solvent peaks were taken as reference (CDCl<sub>3</sub>: 7.26 ppm, CD<sub>2</sub>Cl<sub>2</sub>: 5.30 ppm). For <sup>1</sup>H NMR assignments, the chemical shifts are given in ppm. Coupling constants *J* are given in Hz. Peaks are described as singlet (s), doublet (d), triplet (t), quartet (q), multiplet (m) and broad (br).

*ElectroSpray High Resolution Mass Spectrometry* (ESI-TOF) analyses were performed on a Bruker *Micro-TOF* mass spectrometer at the Service de Spectrométrie de Masse, Université de Strasbourg (sample solutions were introduced into the mass spectrometer source with a syringe pump with a flow rate of 40  $\mu\text{l}\cdot\text{min}^{-1}$ ).

### Synthesis of Macrocycle 3

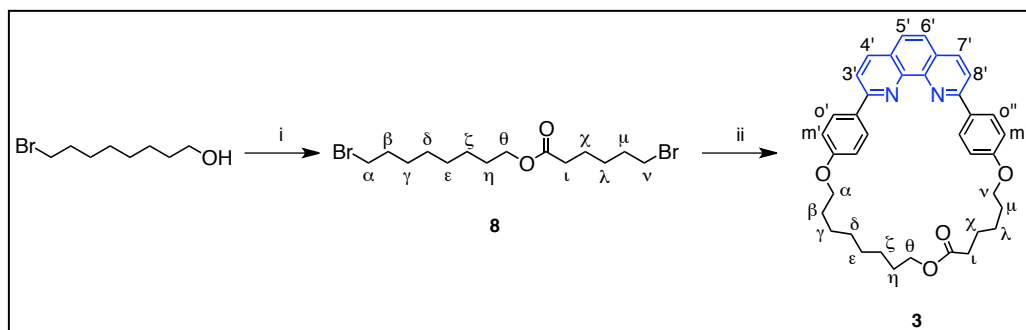

**Figure S11.** Synthesis of macrocycle 3: (i) 6-bromohexanoyl chloride, pyridine, r.t., 1 h, 70 %; (ii) 2,9-diphenol-1,10-phenanthroline,  $\text{Cs}_2\text{CO}_3$ , DMF, 60°C, 3 d, 96 %.

### Compound 8

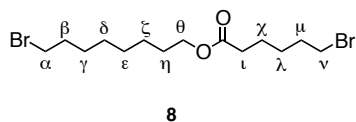

A solution of 6-bromohexanoyl chloride (4.90 g, 23 mmol), 8-bromo-1-octanol (3.14 g, 15 mmol), in pyridine (100 mL) was stirred 1 h at room temperature. After that, the mixture was poured into water (100 mL) and extracted with  $\text{CH}_2\text{Cl}_2$  (3\*20 mL). The organic phases were combined, washed with HCl (6N) (20 mL),  $\text{NaHCO}_{3\text{sat}}$  (20 mL), water (20 mL) and dried over  $\text{MgSO}_4$ . Concentration under reduced pressure followed by column chromatography ( $\text{SiO}_2$ ,  $\text{CH}_2\text{Cl}_2$ /pentane: 50/50) afforded compound 8 (4.05 g, 70 %) as a white solid.  $^1\text{H}$  NMR ( $\text{CDCl}_3$ , 400 MHz, 25°C):  $\delta$  = 4.01 (t,  $^3J$  = 6.4 Hz, 2H,  $\text{H}_\theta$ ), 3.43-3.29 (m, 4H,  $\text{H}_{\alpha,\nu}$ ), 2.27 (t,  $^3J$  = 7.6 Hz, 2H,  $\text{H}_\nu$ ), 1.92-1.18 (m, 18H,  $\text{H}_{\beta,\gamma,\delta,\varepsilon,\zeta,\eta,\chi,\lambda,\mu}$ );  $^{13}\text{C}$  NMR ( $\text{CDCl}_3$ , 100 MHz, 25°C):  $\delta$  = 173.5, 64.4, 34.1, 33.9, 33.5, 32.7, 32.4, 29.0, 28.6, 28.6, 28.0, 27.6, 25.8, 24.1.

### Macrocycle 3

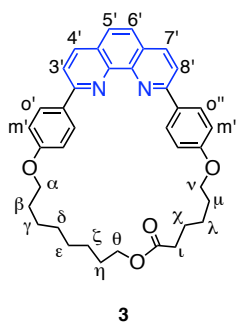

To a suspension of  $\text{Cs}_2\text{CO}_3$  (1 g, 3.069 mmol) in DMF (135 mL) at  $60^\circ\text{C}$  was added over 24 h a solution of 2,9-di(*p*-phenol)-1,10-phenanthroline (0.348 g, 0.956 mmol) and 5-bromopentyl-11-bromoundecanoate **8** in DMF (50 mL). After the addition, the solution was stirred 72 h at  $60^\circ\text{C}$ . DMF was then removed under vacuum and the residue taken up in a mixture of  $\text{H}_2\text{O}/\text{CH}_2\text{Cl}_2$  (50 mL). The aqueous layer was extracted with  $\text{CH}_2\text{Cl}_2$  (3\*50 mL), the organic phases were combined, dried over  $\text{MgSO}_4$ , and filtered. Concentration under reduced pressure followed by column chromatography ( $\text{SiO}_2$ ,  $\text{CH}_2\text{Cl}_2$ ) afforded macrocycle **3** (540 mg, 96%) as a white solid.  $^1\text{H}$  NMR ( $\text{CD}_2\text{Cl}_2$ , 400 MHz,  $25^\circ\text{C}$ ):  $\delta$  = 8.42-8.30 (m, 6H,  $\text{H}_{\text{o}',\text{o}'',4',7'}$ ), 8.10 (d,  $^3J$  = 8.4 Hz, 2H,  $\text{H}_{3',8'}$ ), 7.80 (s, 2H,  $\text{H}_{5',6'}$ ), 7.12 (d,  $^3J$  = 8.8 Hz, 4H,  $\text{H}_{\text{m}',\text{m}''}$ ), 4.17-4.02 (m, 6H,  $\text{H}_{\alpha,\nu,\theta}$ ), 2.34 (d,  $^3J$  = 7.6 Hz, 2H,  $\text{H}_l$ ), 1.95-1.79 (m, 4H,  $\text{H}_{\beta,\mu}$ ), 1.78-1.34 (m, 14H,  $\text{H}_{\gamma,\delta,\varepsilon,\zeta,\eta,\chi,\lambda}$ );  $^{13}\text{C}$  NMR ( $\text{CDCl}_3$ , 100 MHz,  $25^\circ\text{C}$ ):  $\delta$  = 173.9, 160.8, 156.4, 146.4, 137.0, 132.6, 132.5, 129.3, 127.9, 126.0, 119.5, 115.4, 68.8, 68.6, 64.0, 35.0, 30.0, 29.4, 29.2, 29.1, 29.0, 26.4, 26.4, 26.2, 25.1; MS (ES): calcd for  $\text{C}_{38}\text{H}_{40}\text{N}_2\text{O}_4$ : 611.29  $[\text{M}+\text{Na}]^+$ , found 611.30.

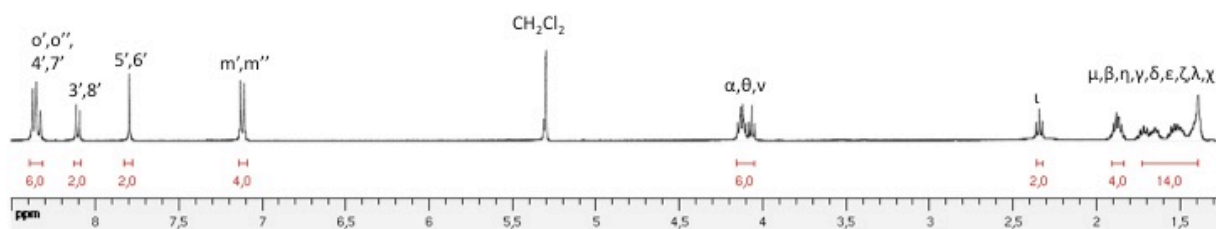

**Figure SI2.**  $^1\text{H}$  NMR spectrum of macrocycle **3** in  $\text{CD}_2\text{Cl}_2$ .

## Compound 2

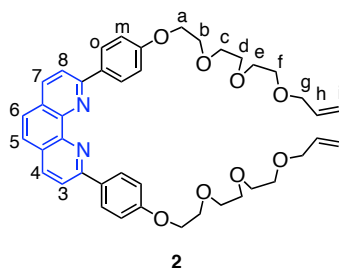

A solution of 2,9-di(*p*-phenol)-1,10-phenanthroline (500 mg, 1.37 mmol), 1-bromo-3,6,9-trioxadodec-11ene (763 mg, 3.00 mmol), and cesium carbonate (4.5 g, 13.7 mmol) in DMF (10 mL) was stirred overnight at 60°C. After cooling down to room temperature, the mixture was filtered to remove cesium carbonate. Concentration under reduced pressure followed by column chromatography (SiO<sub>2</sub>, CH<sub>2</sub>Cl<sub>2</sub> → CH<sub>2</sub>Cl<sub>2</sub>/MeOH: 99/1; afforded compound **2** (796 mg, 82 %) as a yellow solid. <sup>1</sup>H NMR (CD<sub>2</sub>Cl<sub>2</sub>, 400 MHz, 25°C): δ = 8.45 (d, <sup>3</sup>*J* = 8.8 Hz, 4H, H<sub>o</sub>), 8.32 (d, <sup>3</sup>*J* = 8.4 Hz, 2H, H<sub>4,7</sub>), 8.14 (d, <sup>3</sup>*J* = 8.4 Hz, 2H, H<sub>3,8</sub>), 7.80 (s, 2H, H<sub>5,6</sub>), 7.18 (d, <sup>3</sup>*J* = 8.8 Hz, 4H, H<sub>m</sub>), 6.04-5.89 (m, 2H, H<sub>h</sub>), 5.43-5.15 (m, 4H, H<sub>i</sub>), 4.29 (t, <sup>3</sup>*J* = 4.4 Hz, 4H, H<sub>a</sub>), 4.11-4.00 (m, 4H, H<sub>g</sub>), 3.99-3.51 (m, 20H, H<sub>b,c,d,e,f</sub>); <sup>13</sup>C NMR (CD<sub>2</sub>Cl<sub>2</sub>, 100 MHz, 25°C): δ = 160.2, 155.8, 146.0, 136.7, 135.1, 132.2, 128.8, 127.6, 125.6, 119.2, 116.4, 114.8, 72.0, 70.8, 70.6, 70.6, 69.6, 69.6, 67.6; HR-MS (ES): calcd for C<sub>42</sub>H<sub>48</sub>N<sub>2</sub>O<sub>8</sub>: 709.349 [M+H]<sup>+</sup>, found 709.356.

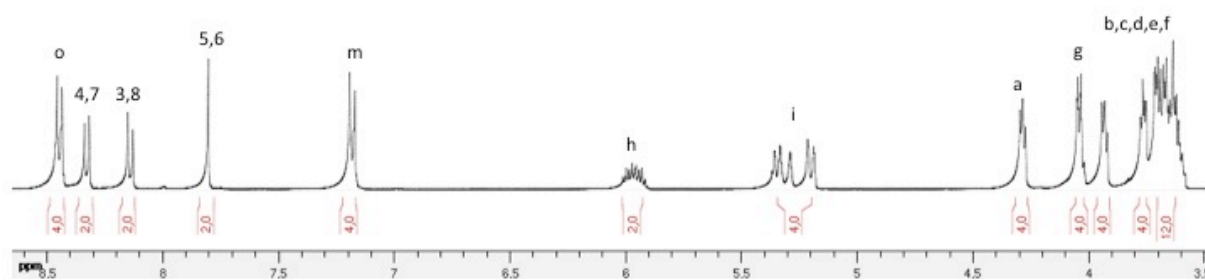

Figure SI3. <sup>1</sup>H NMR spectrum of compound **2** in CD<sub>2</sub>Cl<sub>2</sub>.

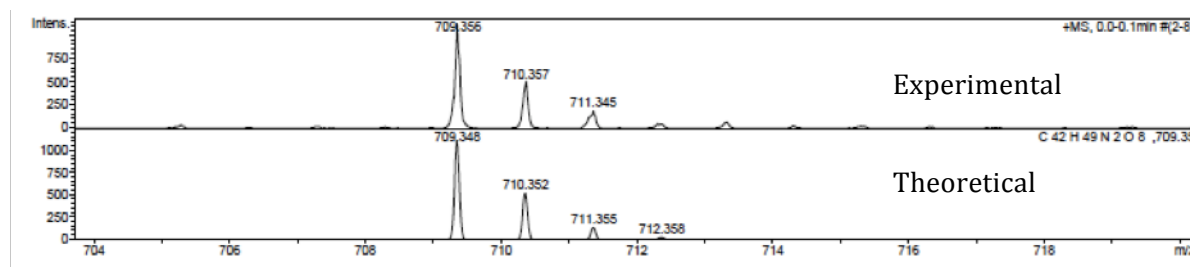

Figure SI4. HR ES-MS spectrum of compound **2** (top) and the corresponding simulation (bottom).

## Macrocycle 1

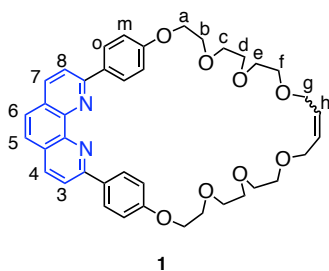

### Method A

Grubb's 1<sup>st</sup> generation catalyst (5.8 mg, 7.0  $\mu\text{mol}$ ) was added to a solution of **2** (100.0 mg, 0.14 mmol) in  $\text{CH}_2\text{Cl}_2$  (14 mL). After 6h at room temperature, an additional portion of catalyst (5.8 mg, 7.0  $\mu\text{mol}$ ) was added. After 5 days, concentration under reduced pressure followed by column chromatography ( $\text{SiO}_2$ ,  $\text{CH}_2\text{Cl}_2 \rightarrow \text{CH}_2\text{Cl}_2/\text{MeOH}$ : 99/1; afforded compound **1** (68.6 mg, 72 %) as a yellow solid.

### Method B

To a solution of catenand **6** (64.7 mg, 0.051 mmol) in THF / MeOH (1 / 1, 6 mL) was added a solution of KOH (5.7 mg, 0.102 mmol) in MeOH (1 mL) and the solution was stirred for 1 h. The solvents were removed under vacuum, the residue taking up in  $\text{CH}_2\text{Cl}_2$  and filtrate, leaving an insoluble potassium salt of opened macrocycle **3**. The organic layer was concentrated under vacuum to give compound **1** as (34.7 mg, 100%) as a colorless solid.

### Analysis

$^1\text{H}$  NMR ( $\text{CD}_2\text{Cl}_2$ , 400 MHz, 25°C):  $\delta$  = 8.42 (d,  $^3J$  = 8.8 Hz, 4H,  $\text{H}_o$ ), 8.27 (d,  $^3J$  = 8.4 Hz, 2H,  $\text{H}_{4,7}$ ), 8.10 (d,  $^3J$  = 8.4 Hz, 2H,  $\text{H}_{3,8}$ ), 7.75 (s, 2H,  $\text{H}_{5,6}$ ), 7.14 (d,  $^3J$  = 8.8 Hz, 4H,  $\text{H}_m$ ), 5.87-5.81 (m, 2H,  $\text{H}_h$ ), 4.24 (t,  $^3J$  = 4.4 Hz, 4H,  $\text{H}_a$ ), 4.07-3.99 (m, 4H,  $\text{H}_g$ ), 3.94-3.50 (m, 20H,  $\text{H}_{b,c,d,e,f}$ );  $^{13}\text{C}$  NMR ( $\text{CD}_2\text{Cl}_2$ , 100 MHz, 25°C):  $\delta$  = 160.2, 155.8, 146.0, 136.6, 132.2, 129.5, 128.8, 127.6, 125.6, 119.0, 114.8, 71.1, 70.9, 70.7, 70.6, 69.7, 69.6, 67.6; HR-MS (ES): calcd for  $\text{C}_{40}\text{H}_{44}\text{N}_2\text{O}_8$ : 681.317  $[\text{M}+\text{H}]^+$ , found 681.316.



= 7.6 Hz, 2H, H<sub>l</sub>), 2.01-1.32 (m, 18H, H<sub>β,γ,δ,ε,ζ,η,χ,λ,μ</sub>); HR-MS (ES): calcd for C<sub>80</sub>H<sub>88</sub>CuN<sub>4</sub>O<sub>12</sub>:  
1359.569 [M]<sup>+</sup>, found 1359.562.

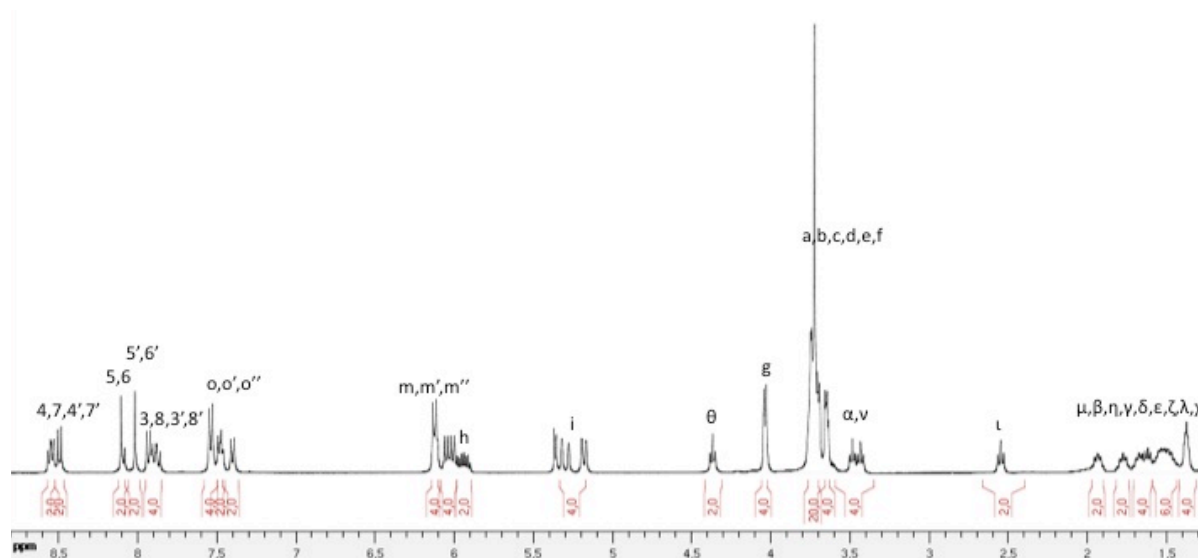

**Figure SI7.** <sup>1</sup>H NMR spectrum of Pseudo-Cu(I)-[2]catenane **4**<sup>+</sup> in CD<sub>2</sub>Cl<sub>2</sub>.

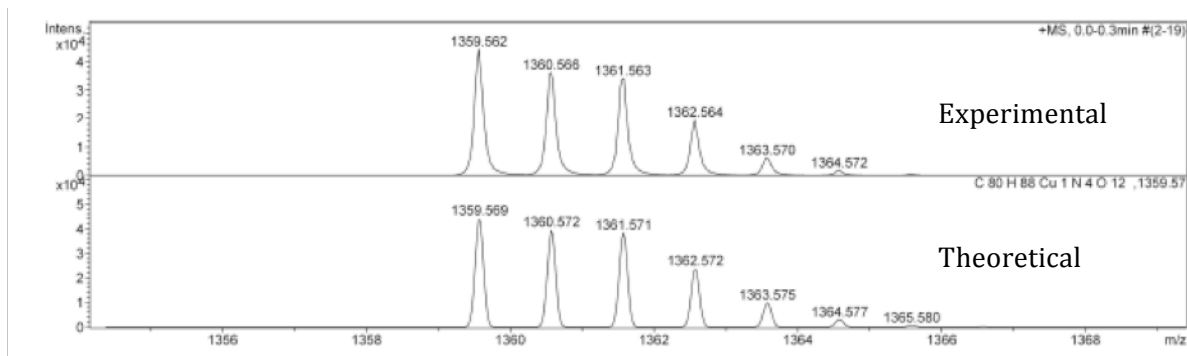

**Figure SI8.** HR ES-MS spectrum of pseudo-Cu(I)-[2]catenane **4**<sup>+</sup> (*top*) and the corresponding simulation (*bottom*).





## [2]catenand **6**

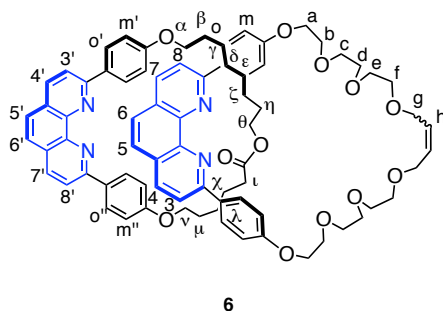

6

To a solution of catenane **5**<sup>+</sup> (75.4 mg, 0.051 mmol) in a mixture of CH<sub>2</sub>Cl<sub>2</sub> (3 mL) and CH<sub>3</sub>CN (1.5 mL) was added a solution of saturated KCN in water (0.5 mL) and the solution was stirred for 30 min. Water (20 mL) was added and the aqueous layer was extracted with CH<sub>2</sub>Cl<sub>2</sub> (3\*20 mL). The organic phases were combined and concentrated under vacuum to give, without further purification, the desired catenand **6** (64.7 mg, 0.051 mmol, 100%) as a pale yellow solid. <sup>1</sup>H NMR (CD<sub>2</sub>Cl<sub>2</sub>, 400 MHz, 25°C): δ = 8.60-8.34 (m, 8H, H<sub>o,o',o''</sub>), 8.35-8.15 (m, 4H, H<sub>4,7,4',7'</sub>), 8.15-7.99 (m, 4H, H<sub>3,8,3',8'</sub>), 7.83-7.60 (m, 4H, H<sub>5,6,5',6'</sub>), 7.23-6.91 (m, 8H, H<sub>m,m',m''</sub>), 5.88-5.72 (m, 2H, H<sub>h</sub>), 4.20-4.11 (m, 2H, H<sub>θ</sub>), 4.11-4.03 (m, 4H, H<sub>a</sub>), 4.03-3.96 (m, 4H, H<sub>α,v</sub>), 3.96-3.90 (m, 4H, H<sub>g</sub>), 3.84-3.73 (m, 4H, H<sub>b</sub>), 3.70-3.48 (m, 16H, H<sub>c,d,e,f</sub>), 2.37 (t, <sup>3</sup>J = 7.6 Hz, 2H, H<sub>l</sub>), 1.91-1.18 (m, 18H, H<sub>β,γ,δ,ε,ζ,η,χ,λ,μ</sub>); HR-MS (ES): calcd for C<sub>78</sub>H<sub>84</sub>N<sub>4</sub>O<sub>12</sub>: 1269.616 [M+H]<sup>+</sup>, found 1269.615.

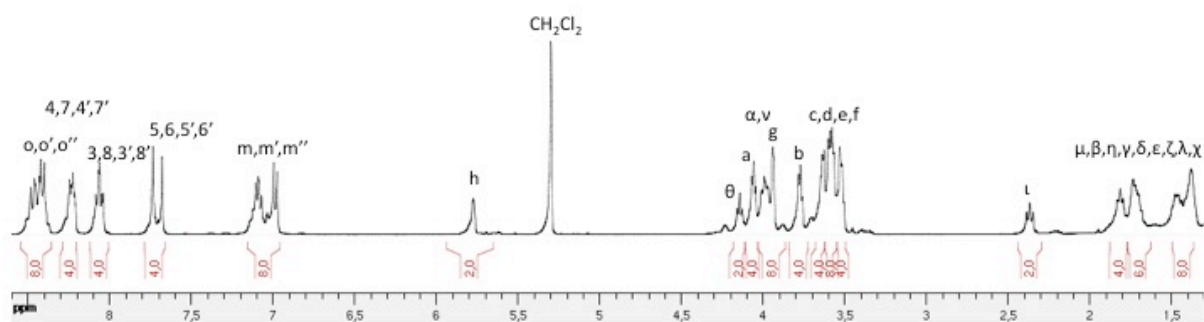

Figure SI11. <sup>1</sup>H NMR spectrum of [2]catenand **6** in CD<sub>2</sub>Cl<sub>2</sub>.

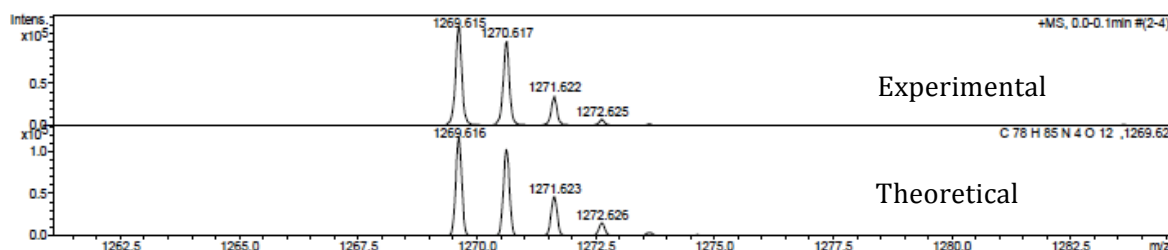

**Figure S112.** HR ES-MS spectrum of [2]catenane **6** (*top*) and the corresponding simulation (*bottom*).

### Macrocycle 7

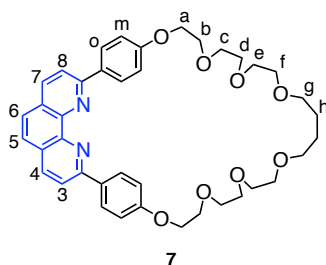

A mixture of **1** (100 mg, 0.147 mmol) and Pd/C (10 wt. % loading, 10 mg) in THF (50 mL) was stirred at room temperature under positive H<sub>2</sub> atmosphere. After 12 h, the mixture was filtered on celite. Concentration under reduced pressure followed by column chromatography (SiO<sub>2</sub>, CH<sub>2</sub>Cl<sub>2</sub> → CH<sub>2</sub>Cl<sub>2</sub>/MeOH: 97/3) afforded compound **7** (92.3 mg, 92% yield) as a colorless glassy product. <sup>1</sup>H NMR (CD<sub>2</sub>Cl<sub>2</sub>, 400 MHz, 25°C): δ = 8.45 (d, <sup>3</sup>J = 8.8 Hz, 4H, H<sub>o</sub>), 8.31 (d, <sup>3</sup>J = 8.4 Hz, 2H, H<sub>4,7</sub>), 8.13 (d, <sup>3</sup>J = 8.4 Hz, 2H, H<sub>3,8</sub>), 7.79 (s, 2H, H<sub>5,6</sub>), 7.19 (d, <sup>3</sup>J = 8.8 Hz, 4H, H<sub>m</sub>), 4.28 (t, <sup>3</sup>J = 4.4 Hz, 4H, H<sub>a</sub>), 3.94-3.89 (m, 4H, H<sub>b</sub>), 3.80-3.60 (m, 16H, H<sub>b,c,d,e,f</sub>), 3.55-3.51 (m, 4H, H<sub>g</sub>), 1.76-1.68 (m, 4H, H<sub>h</sub>); <sup>13</sup>C NMR (CD<sub>2</sub>Cl<sub>2</sub>, 100 MHz, 25°C): δ = 160.3, 155.9, 146.1, 136.8, 132.3, 128.9, 127.7, 125.7, 119.1, 114.9, 71.1, 71.0, 70.8, 70.7, 70.3, 69.7, 67.7, 26.5; HR-MS (ES): calcd for C<sub>40</sub>H<sub>46</sub>N<sub>2</sub>O<sub>8</sub>: 683.333 [M+H]<sup>+</sup>, found 683.332.

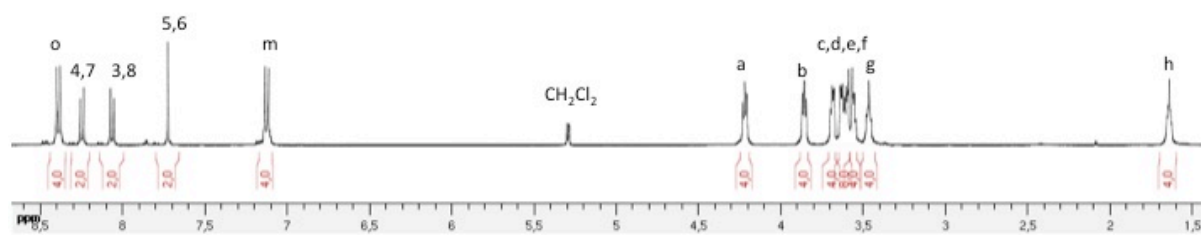

**Figure SI13.**  $^1\text{H}$  NMR spectrum of macrocycle **7** in  $\text{CD}_2\text{Cl}_2$ .

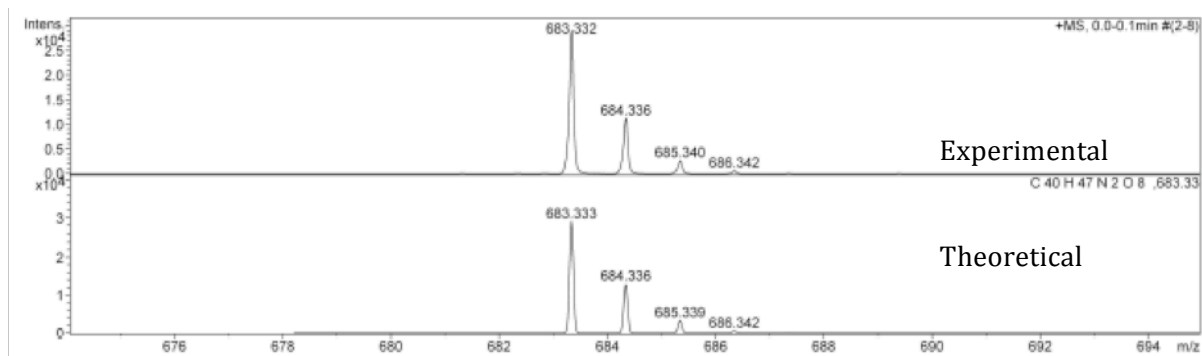

**Figure SI14.** HR ES-MS spectrum of macrocycle **7** (*top*) and the corresponding simulation (*bottom*).
